# Supplementary material
Source: Springer Nature journal article supplement (https://www.springermedizin.de/resource/supplementary/12967_2013_1759_MOESM12_ESM.pdf/9575252)

# GeneGo Pathways

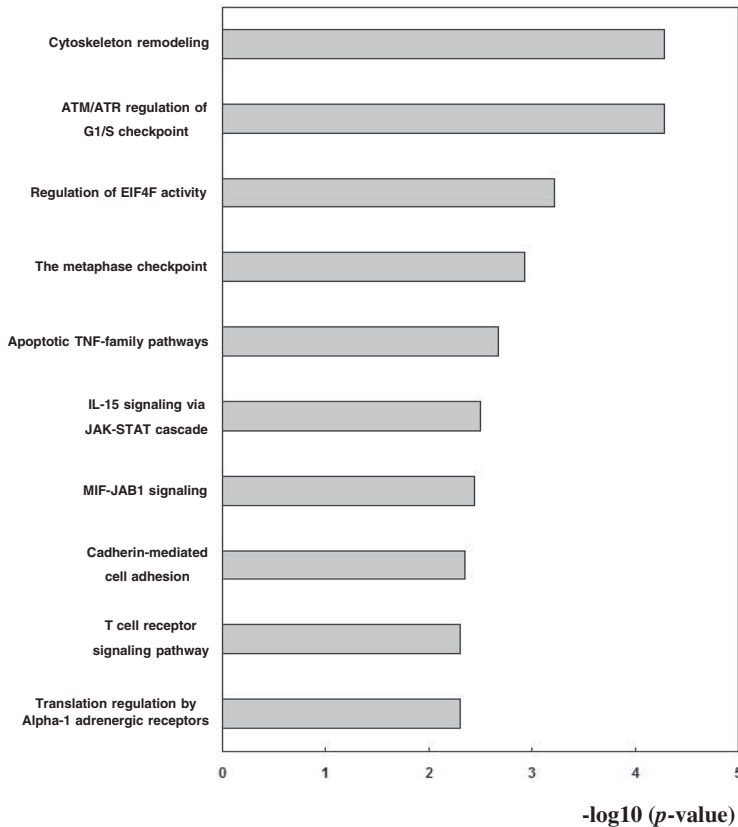

Supplement: MOESM12 [file 9575252]
